# Supplementary material
Source: MDPI journal article supplement (https://www.mdpi.com/2311-553X/6/1/9)
Supplement: s1 [file s1]

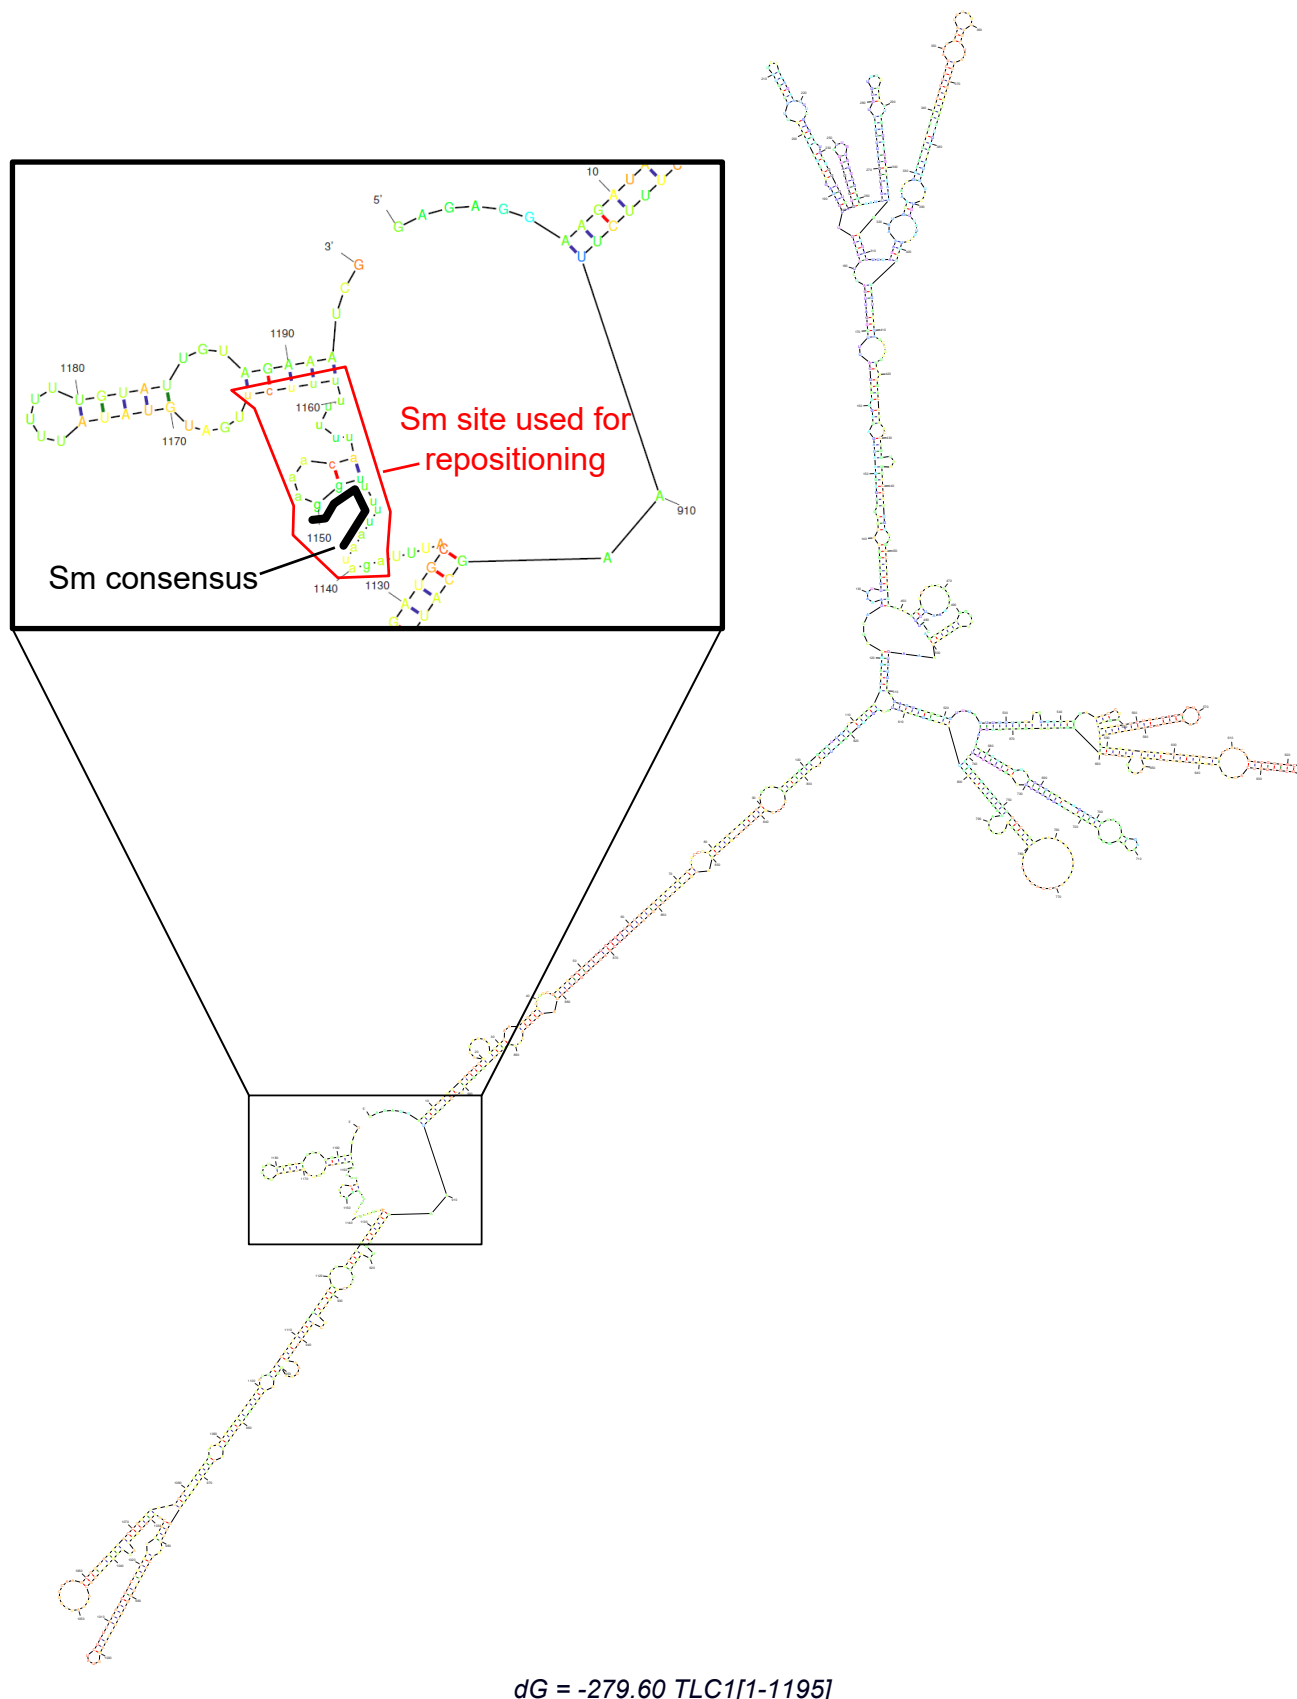

**Figure S1.** *Mfold* software prediction for the secondary structure of NNS-terminated TLC1 (nucleotides 1–1195). The structure is colored using the pnum preset on the *Mfold* RNA web server to reflect the determinedness (i.e., propensity of forming the shown structure) based on free-energy calculations, with redder colors indicating well determined structures and bluer colors indicating poorly determined structures [43]. The 3' end of the RNA structure is enlarged in the inset, and the Sm-binding consensus is outlined in black.

tlc1-Sm<sup>-</sup>  
+Sm@1089

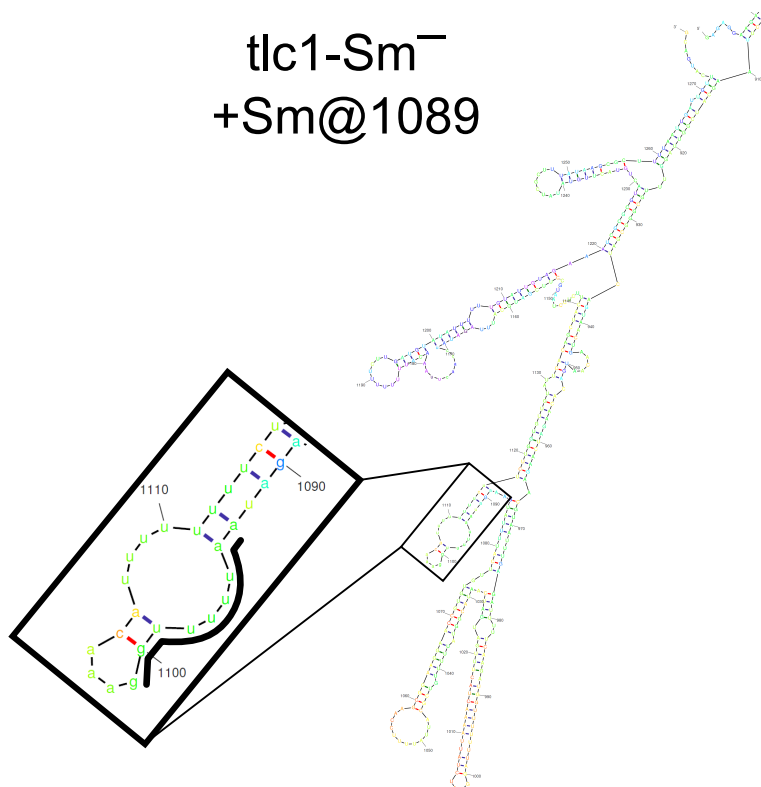

tlc1-Sm<sup>-</sup>  
+Sm@1003

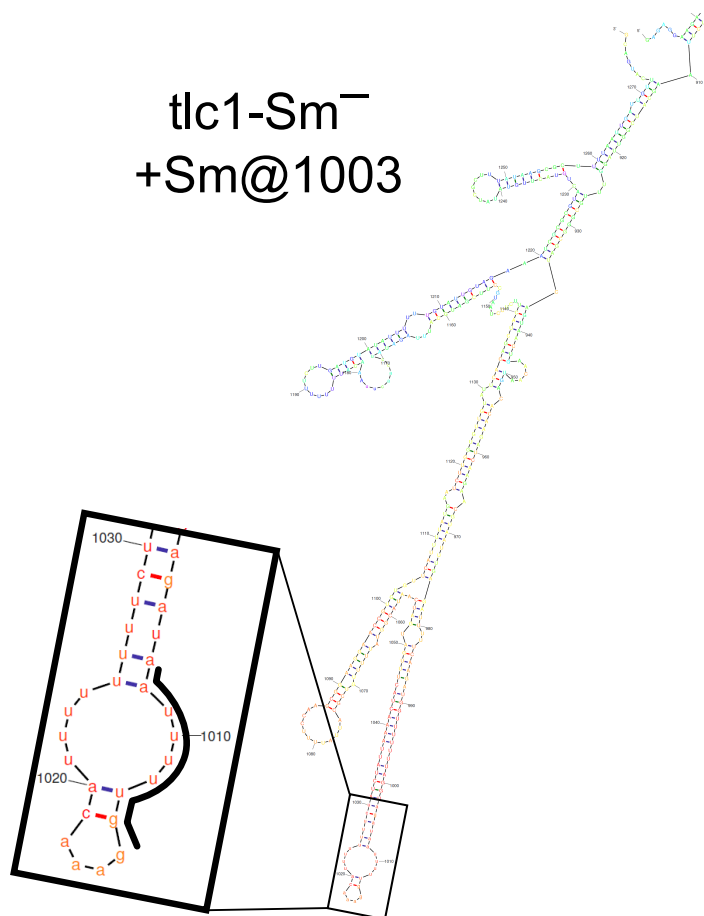

tlc1-Sm<sup>-</sup>  
+Sm@926

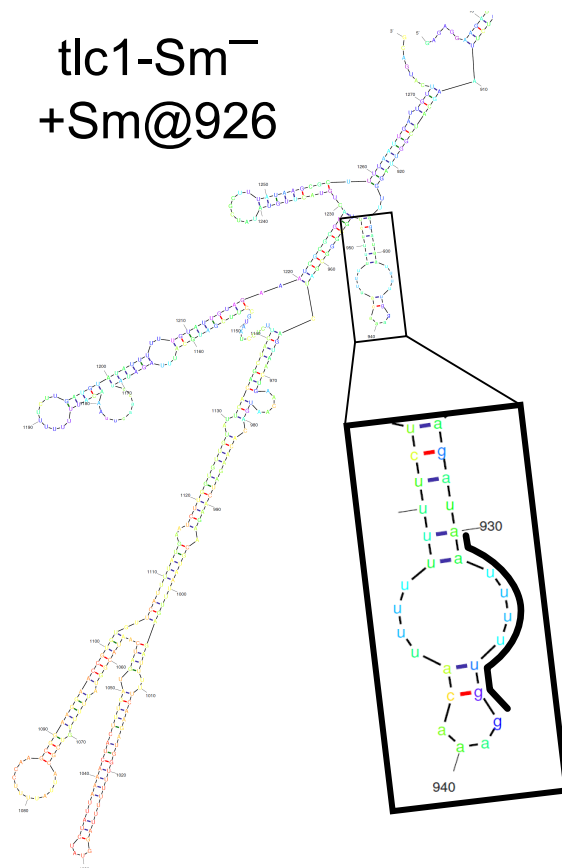

**Figure S2.** *Mfold* software predictions for the secondary structures of repositioned Sm-binding sites. Secondary structure predictions are shown for poly(A)+ TLC1 RNAs containing repositioned Sm binding sites. Bases are colored by pnum value to reflect determinedness as in Figure S1 [43], and only the distal portion of the terminal arm is shown in each *Mfold* for the sake of simplicity. Enlarged insets in each panel show the 28-nucleotide Sm site used in the repositioning experiments in Figure 3 with the Sm consensus outlined in black.

Table S1: List of plasmids used in this study

| Plasmid name    | Contents                                                 | Origin     |
|-----------------|----------------------------------------------------------|------------|
| pRS414          | <i>pTRP1-CEN</i> vector                                  | [47]       |
| pSD107          | <i>TLC1</i> in a <i>pTRP1-CEN</i> vector                 | [48]       |
| pDZ481 (pAS501) | <i>tlc1-Sm<sup>-</sup></i> in a pSD107 backbone          | [5]        |
| pDZ573          | Tandem <i>TLC1-TLC1</i> fusion gene in a pSD107 backbone | This study |
| pDZ574          | <i>TLC1-SmCP@211</i> in a pSD107 backbone                | This study |
| pDZ575          | <i>TLC1-SmCP@451</i> in a pSD107 backbone                | This study |
| pDZ576          | <i>TLC1-SmCP@1024</i> in a pSD107 backbone               | This study |
| pDZ577          | <i>TLC1-SmCP@546</i> in a pSD107 backbone                | This study |
| pDZ578          | <i>tlc1-Sm<sup>-</sup>CP@211</i> in a pSD107 backbone    | This study |
| pDZ579          | <i>tlc1-Sm<sup>-</sup>CP@451</i> in a pSD107 backbone    | This study |
| pDZ580          | <i>tlc1-Sm<sup>-</sup>CP@1024</i> in a pSD107 backbone   | This study |
| pDZ581          | <i>tlc1-Sm<sup>-</sup>CP@546</i> in a pSD107 backbone    | This study |
| pDZ831          | <i>tlc1-Sm<sup>-</sup>+Sm@1089</i> in a pSD107 backbone  | This study |
| pDZ966          | <i>tlc1-Sm<sup>-</sup>+Sm@926</i> in a pSD107 backbone   | This study |
| pDZ967          | <i>tlc1-Sm<sup>-</sup>+Sm@1003</i> in a pSD107 backbone  | This study |
